# Supplementary material for: Incorporating single-arm studies in meta-analysis of randomised controlled trials: a simulation study
Source: Springer Nature journal article supplement (doi:10.1186/s12874-021-01301-1), 2021-06-03
Supplement: MOESM1 [file 19226056]

Supplementary material for: *Incorporating  
single-arm studies in meta-analysis of  
randomised controlled trials: A simulation  
study*

Janharpreet Singh\*<sup>1</sup>, Keith R. Abrams<sup>1</sup>, Sylwia Bujkiewicz<sup>1</sup>

<sup>1</sup>*Department of Health Sciences, University of Leicester, Leicester, UK*

\*Corresponding author: [js929@leicester.ac.uk](mailto:js929@leicester.ac.uk)

## Appendix A - Simulation scenarios

We conducted a simulation study under 15 scenarios, using the model described in Section 3.1 to simulate data for 1000 iterations in each scenario. Table A.1 lists the model parameter values in the model which varied across scenarios. Here,  $n$  represents the number of RCTs,  $m$  and  $l$  represent the number of single-arm studies on each arm,  $\xi$  and  $\eta$  represent bias in single-arm data on each arm,  $\sigma_1$  and  $\sigma_2$  represent the between-study heterogeneity for each RCT arm, and  $\sigma_3$  and  $\sigma_4$  represent the between-study heterogeneity for single-arm studies on each arm.

Table A1: Model parameter values specified to simulate datasets under 15 scenarios.

| Scenario | $n$ | $m$ | $l$ | $\xi$ | $\eta$ | $\sigma_1$ | $\sigma_2$ | $\sigma_3$ | $\sigma_4$ |
|----------|-----|-----|-----|-------|--------|------------|------------|------------|------------|
| S1       | 15  | 10  | 5   | 0.2   | 0.4    | 0.6        | 0.7        | 0.8        | 1.0        |
| S2       | 10  | 10  | 10  | 0.2   | 0.4    | 0.6        | 0.7        | 0.8        | 1.0        |
| S3       | 5   | 10  | 15  | 0.2   | 0.4    | 0.6        | 0.7        | 0.8        | 1.0        |
| S4       | 3   | 12  | 15  | 0.2   | 0.4    | 0.6        | 0.7        | 0.8        | 1.0        |
| S5       | 1   | 15  | 14  | 0.2   | 0.4    | 0.6        | 0.7        | 0.8        | 1.0        |
| S6       | 15  | 10  | 5   | 0     | 0      | 0.6        | 0.7        | 0.8        | 1.0        |
| S7       | 15  | 10  | 5   | 0.4   | 0.6    | 0.6        | 0.7        | 0.8        | 1.0        |
| S8       | 15  | 10  | 5   | 0.6   | 0.8    | 0.6        | 0.7        | 0.8        | 1.0        |
| S9       | 15  | 10  | 5   | 0.8   | 1.0    | 0.6        | 0.7        | 0.8        | 1.0        |
| S10      | 15  | 10  | 5   | 0     | 0      | 0.6        | 0.7        | 0.1        | 0.3        |
| S11      | 15  | 10  | 5   | 0     | 0      | 0.6        | 0.7        | 0.3        | 0.5        |
| S12      | 15  | 10  | 5   | 0     | 0      | 0.6        | 0.7        | 0.5        | 0.8        |
| S13      | 15  | 10  | 5   | 0.2   | 0.4    | 0.6        | 0.7        | 0.1        | 0.3        |
| S14      | 15  | 10  | 5   | 0.2   | 0.4    | 0.6        | 0.7        | 0.3        | 0.5        |
| S15      | 15  | 10  | 5   | 0.2   | 0.4    | 0.6        | 0.7        | 0.5        | 0.8        |

## Appendix B - Additional results plots

We perform a sensitivity analysis by simulating data using the BPrandom method described in Section 2.1.3. Figure B.1 shows the results from the sensitivity analysis with scenarios labelled S1\*-5\*.

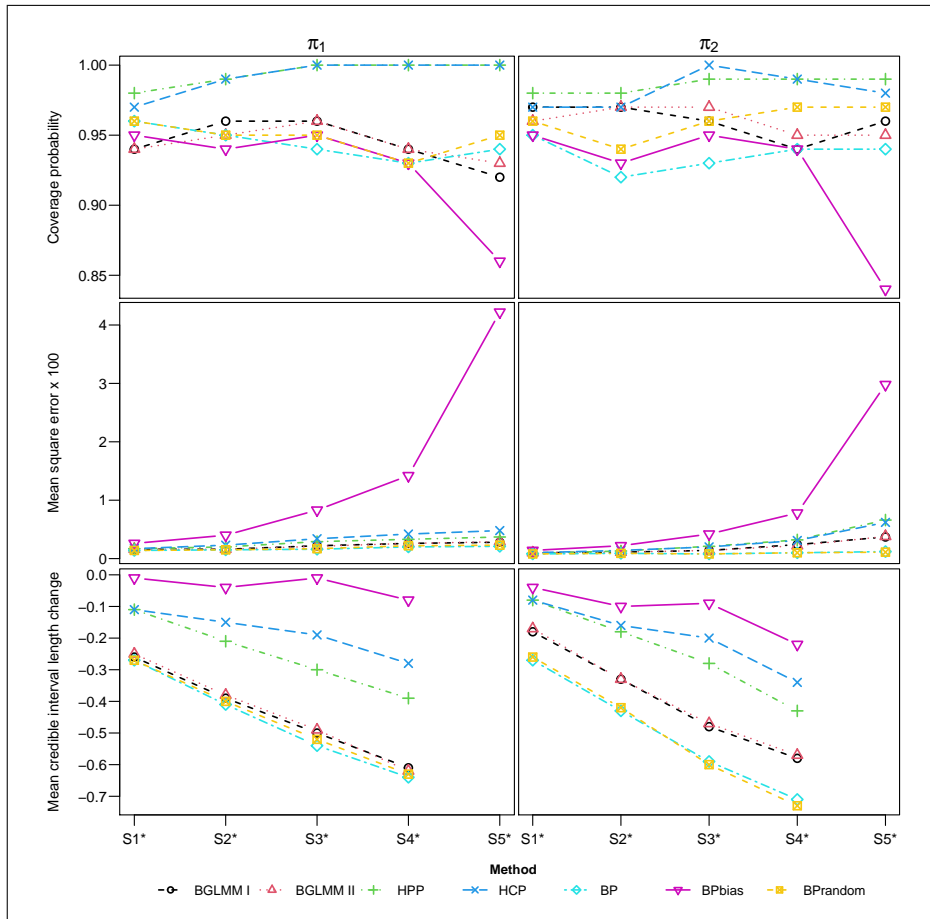

Figure B1: Coverage, MSE, and mean CrIL change for each method across scenarios S1\*-5\*, where data were simulated using the BPrandom method, and the number of RCTs were gradually decreased.

## Appendix C - Simulation results tables

The following tables list the results for coverage, MSE, mean CrIL, and mean CrIL length change, for each of the 15 scenarios.

Table C1: Coverage, MSE, and mean CrIL change for estimands  $\pi_1$  and  $\pi_2$ , for each method across scenarios S1-5.

| Scenario | Measure       | Estimand | BGLMM | BGLMM2 | HPP   | HCP   | BP    | BPbias | BPrandom |
|----------|---------------|----------|-------|--------|-------|-------|-------|--------|----------|
| S1       | Coverage      | $\pi_1$  | 0.92  | 0.93   | 0.97  | 0.96  | 0.89  | 0.97   | 0.91     |
|          |               | $\pi_2$  | 0.95  | 0.94   | 0.96  | 0.95  | 0.90  | 0.93   | 0.97     |
|          | MSEx100       | $\pi_1$  | 0.21  | 0.21   | 0.18  | 0.22  | 0.24  | 0.27   | 0.22     |
|          |               | $\pi_2$  | 0.15  | 0.14   | 0.14  | 0.17  | 0.14  | 0.23   | 0.12     |
|          | Length        | $\pi_1$  | 0.17  | 0.17   | 0.19  | 0.19  | 0.16  | 0.22   | 0.16     |
|          |               | $\pi_2$  | 0.15  | 0.15   | 0.16  | 0.17  | 0.12  | 0.17   | 0.16     |
|          | Length change | $\pi_1$  | -0.17 | -0.10  | -0.08 | -0.17 | -0.16 | -0.19  | -0.27    |
|          |               | $\pi_2$  | -0.14 | -0.14  | -0.11 | -0.06 | -0.16 | 0.19   | -0.20    |
| S2       | Coverage      | $\pi_1$  | 0.92  | 0.94   | 0.98  | 0.98  | 0.84  | 0.98   | 0.90     |
|          |               | $\pi_2$  | 0.95  | 0.95   | 0.97  | 0.96  | 0.89  | 0.96   | 0.97     |
|          | MSEx100       | $\pi_1$  | 0.29  | 0.27   | 0.22  | 0.28  | 0.37  | 0.37   | 0.30     |
|          |               | $\pi_2$  | 0.18  | 0.18   | 0.17  | 0.21  | 0.16  | 0.35   | 0.14     |
|          | Length        | $\pi_1$  | 0.19  | 0.20   | 0.22  | 0.24  | 0.17  | 0.29   | 0.17     |
|          |               | $\pi_2$  | 0.17  | 0.17   | 0.18  | 0.20  | 0.13  | 0.23   | 0.16     |
|          | Length change | $\pi_1$  | -0.29 | -0.26  | -0.20 | -0.11 | -0.27 | 0.27   | -0.27    |
|          |               | $\pi_2$  | -0.30 | -0.29  | -0.23 | -0.16 | -0.27 | 0.30   | -0.35    |
| S3       | Coverage      | $\pi_1$  | 0.94  | 0.94   | 0.99  | 0.99  | 0.75  | 0.98   | 0.85     |
|          |               | $\pi_2$  | 0.97  | 0.98   | 0.99  | 1.00  | 0.86  | 0.97   | 0.95     |
|          | MSEx100       | $\pi_1$  | 0.40  | 0.40   | 0.31  | 0.42  | 0.64  | 0.76   | 0.49     |
|          |               | $\pi_2$  | 0.23  | 0.22   | 0.22  | 0.30  | 0.21  | 0.71   | 0.18     |
|          | Length        | $\pi_1$  | 0.22  | 0.23   | 0.27  | 0.33  | 0.18  | 0.42   | 0.20     |
|          |               | $\pi_2$  | 0.19  | 0.20   | 0.23  | 0.28  | 0.13  | 0.34   | 0.16     |
|          | Length change | $\pi_1$  | -0.44 | -0.41  | -0.32 | -0.18 | -0.45 | 0.30   | -0.41    |
|          |               | $\pi_2$  | -0.45 | -0.44  | -0.33 | -0.20 | -0.48 | 0.32   | -0.57    |
| S4       | Coverage      | $\pi_1$  | 0.97  | 0.97   | 1.00  | 1.00  | 0.76  | 0.97   | 0.86     |
|          |               | $\pi_2$  | 1.00  | 1.00   | 0.99  | 1.00  | 0.84  | 0.94   | 0.93     |
|          | MSEx100       | $\pi_1$  | 0.37  | 0.37   | 0.29  | 0.47  | 0.66  | 1.32   | 0.50     |
|          |               | $\pi_2$  | 0.24  | 0.24   | 0.27  | 0.37  | 0.25  | 1.33   | 0.21     |
|          | Length        | $\pi_1$  | 0.25  | 0.24   | 0.31  | 0.39  | 0.18  | 0.49   | 0.20     |
|          |               | $\pi_2$  | 0.24  | 0.24   | 0.27  | 0.34  | 0.14  | 0.41   | 0.17     |
|          | Length change | $\pi_1$  | -0.52 | -0.55  | -0.41 | -0.24 | -0.58 | 0.12   | -0.55    |
|          |               | $\pi_2$  | -0.53 | -0.53  | -0.45 | -0.32 | -0.64 | 0.05   | -0.69    |
| S5       | Coverage      | $\pi_1$  | 0.99  | 0.99   | 1.00  | 1.00  | 0.75  | 0.89   | 0.86     |
|          |               | $\pi_2$  | 1.00  | 1.00   | 1.00  | 0.96  | 0.77  | 0.85   | 0.92     |
|          | MSEx100       | $\pi_1$  | 0.29  | 0.29   | 0.24  | 0.43  | 0.71  | 4.86   | 0.52     |
|          |               | $\pi_2$  | 0.26  | 0.26   | 0.45  | 0.61  | 0.39  | 4.30   | 0.28     |
|          | Length        | $\pi_1$  | 0.26  | 0.26   | 0.35  | 0.58  | 0.20  | 0.59   | 0.21     |
|          |               | $\pi_2$  | 0.34  | 0.34   | 0.35  | 0.50  | 0.15  | 0.49   | 0.19     |

Table C2: Coverage, MSE, and mean CrIL change for estimands  $\pi_1$  and  $\pi_2$ , for each method across scenarios S1\*-5\*.

| Scenario | Measure       | Estimand | BGLMM | BGLMM2 | HPP   | HCP   | BP    | BPbias | BPrandom |
|----------|---------------|----------|-------|--------|-------|-------|-------|--------|----------|
| S1*      | Coverage      | $\pi_1$  | 0.94  | 0.94   | 0.98  | 0.97  | 0.96  | 0.95   | 0.96     |
|          |               | $\pi_2$  | 0.97  | 0.96   | 0.98  | 0.97  | 0.95  | 0.95   | 0.96     |
|          | MSEx100       | $\pi_1$  | 0.16  | 0.16   | 0.17  | 0.17  | 0.14  | 0.26   | 0.14     |
|          |               | $\pi_2$  | 0.10  | 0.10   | 0.09  | 0.10  | 0.08  | 0.14   | 0.08     |
|          | Length        | $\pi_1$  | 0.15  | 0.16   | 0.19  | 0.19  | 0.15  | 0.20   | 0.15     |
|          |               | $\pi_2$  | 0.13  | 0.14   | 0.15  | 0.15  | 0.11  | 0.15   | 0.11     |
|          | Length change | $\pi_1$  | -0.26 | -0.25  | -0.11 | -0.11 | -0.27 | -0.01  | -0.27    |
|          |               | $\pi_2$  | -0.18 | -0.17  | -0.08 | -0.08 | -0.27 | -0.04  | -0.26    |
| S2*      | Coverage      | $\pi_1$  | 0.96  | 0.95   | 0.99  | 0.99  | 0.95  | 0.94   | 0.95     |
|          |               | $\pi_2$  | 0.97  | 0.97   | 0.98  | 0.97  | 0.92  | 0.93   | 0.94     |
|          | MSEx100       | $\pi_1$  | 0.16  | 0.16   | 0.20  | 0.23  | 0.15  | 0.40   | 0.15     |
|          |               | $\pi_2$  | 0.11  | 0.11   | 0.13  | 0.14  | 0.09  | 0.22   | 0.09     |
|          | Length        | $\pi_1$  | 0.17  | 0.17   | 0.22  | 0.24  | 0.15  | 0.24   | 0.15     |
|          |               | $\pi_2$  | 0.15  | 0.15   | 0.18  | 0.19  | 0.11  | 0.18   | 0.12     |
|          | Length change | $\pi_1$  | -0.39 | -0.38  | -0.21 | -0.15 | -0.41 | -0.04  | -0.40    |
|          |               | $\pi_2$  | -0.33 | -0.33  | -0.18 | -0.16 | -0.43 | -0.10  | -0.42    |
| S3*      | Coverage      | $\pi_1$  | 0.96  | 0.96   | 1.00  | 1.00  | 0.94  | 0.95   | 0.95     |
|          |               | $\pi_2$  | 0.96  | 0.97   | 0.99  | 1.00  | 0.93  | 0.95   | 0.96     |
|          | MSEx100       | $\pi_1$  | 0.22  | 0.21   | 0.29  | 0.34  | 0.16  | 0.83   | 0.17     |
|          |               | $\pi_2$  | 0.14  | 0.14   | 0.21  | 0.20  | 0.08  | 0.42   | 0.08     |
|          | Length        | $\pi_1$  | 0.19  | 0.20   | 0.28  | 0.32  | 0.16  | 0.34   | 0.16     |
|          |               | $\pi_2$  | 0.17  | 0.18   | 0.24  | 0.27  | 0.11  | 0.26   | 0.12     |
|          | Length change | $\pi_1$  | -0.50 | -0.49  | -0.30 | -0.19 | -0.54 | -0.01  | -0.52    |
|          |               | $\pi_2$  | -0.48 | -0.47  | -0.28 | -0.20 | -0.59 | -0.09  | -0.60    |
| S4*      | Coverage      | $\pi_1$  | 0.94  | 0.94   | 1.00  | 1.00  | 0.93  | 0.93   | 0.93     |
|          |               | $\pi_2$  | 0.94  | 0.95   | 0.99  | 0.99  | 0.94  | 0.94   | 0.97     |
|          | MSEx100       | $\pi_1$  | 0.26  | 0.26   | 0.33  | 0.42  | 0.20  | 1.42   | 0.22     |
|          |               | $\pi_2$  | 0.24  | 0.22   | 0.32  | 0.31  | 0.10  | 0.78   | 0.10     |
|          | Length        | $\pi_1$  | 0.20  | 0.20   | 0.31  | 0.37  | 0.16  | 0.42   | 0.17     |
|          |               | $\pi_2$  | 0.21  | 0.21   | 0.28  | 0.33  | 0.12  | 0.32   | 0.13     |
|          | Length change | $\pi_1$  | -0.61 | -0.62  | -0.39 | -0.28 | -0.64 | -0.08  | -0.63    |
|          |               | $\pi_2$  | -0.58 | -0.57  | -0.43 | -0.34 | -0.71 | -0.22  | -0.73    |
| S5*      | Coverage      | $\pi_1$  | 0.92  | 0.93   | 1.00  | 1.00  | 0.94  | 0.86   | 0.95     |
|          |               | $\pi_2$  | 0.96  | 0.95   | 0.99  | 0.98  | 0.94  | 0.84   | 0.97     |
|          | MSEx100       | $\pi_1$  | 0.28  | 0.29   | 0.37  | 0.48  | 0.21  | 4.22   | 0.23     |
|          |               | $\pi_2$  | 0.37  | 0.38   | 0.66  | 0.62  | 0.12  | 2.98   | 0.11     |
|          | Length        | $\pi_1$  | 0.20  | 0.20   | 0.36  | 0.57  | 0.18  | 0.53   | 0.18     |
|          |               | $\pi_2$  | 0.30  | 0.30   | 0.35  | 0.50  | 0.13  | 0.42   | 0.15     |

Table C3: Coverage, MSE, and mean CrIL change for estimands  $\pi_1$  and  $\pi_2$ , for each method across scenarios [S6, S1, S7-9].

| Scenario | Measure       | Estimand | BGLMM | BGLMM2 | HPP   | HCP   | BP    | BPbias | BPrandom |
|----------|---------------|----------|-------|--------|-------|-------|-------|--------|----------|
| S6       | Coverage      | $\pi_1$  | 0.94  | 0.94   | 0.98  | 0.97  | 0.93  | 0.97   | 0.94     |
|          |               | $\pi_2$  | 0.95  | 0.94   | 0.94  | 0.96  | 0.85  | 0.94   | 0.91     |
|          | MSEx100       | $\pi_1$  | 0.20  | 0.20   | 0.20  | 0.21  | 0.21  | 0.24   | 0.20     |
|          |               | $\pi_2$  | 0.18  | 0.17   | 0.19  | 0.17  | 0.20  | 0.22   | 0.23     |
|          | Length        | $\pi_1$  | 0.17  | 0.18   | 0.19  | 0.19  | 0.16  | 0.22   | 0.17     |
|          |               | $\pi_2$  | 0.16  | 0.16   | 0.17  | 0.17  | 0.13  | 0.17   | 0.17     |
|          | Length change | $\pi_1$  | -0.16 | -0.16  | -0.09 | -0.08 | -0.15 | 0.16   | -0.17    |
|          |               | $\pi_2$  | -0.08 | -0.09  | -0.04 | -0.04 | -0.11 | 0.19   | -0.15    |
| S1       | Coverage      | $\pi_1$  | 0.92  | 0.93   | 0.97  | 0.96  | 0.89  | 0.97   | 0.91     |
|          |               | $\pi_2$  | 0.95  | 0.94   | 0.96  | 0.95  | 0.90  | 0.93   | 0.97     |
|          | MSEx100       | $\pi_1$  | 0.21  | 0.21   | 0.18  | 0.22  | 0.24  | 0.27   | 0.22     |
|          |               | $\pi_2$  | 0.15  | 0.14   | 0.14  | 0.17  | 0.14  | 0.23   | 0.12     |
|          | Length        | $\pi_1$  | 0.17  | 0.17   | 0.19  | 0.19  | 0.16  | 0.22   | 0.16     |
|          |               | $\pi_2$  | 0.15  | 0.15   | 0.16  | 0.17  | 0.12  | 0.17   | 0.16     |
|          | Length change | $\pi_1$  | -0.17 | -0.17  | -0.10 | -0.08 | -0.17 | 0.16   | -0.19    |
|          |               | $\pi_2$  | -0.14 | -0.14  | -0.11 | -0.06 | -0.16 | 0.19   | -0.20    |
| S7       | Coverage      | $\pi_1$  | 0.88  | 0.88   | 0.96  | 0.96  | 0.75  | 0.97   | 0.80     |
|          |               | $\pi_2$  | 0.95  | 0.95   | 0.96  | 0.97  | 0.85  | 0.95   | 0.96     |
|          | MSEx100       | $\pi_1$  | 0.33  | 0.29   | 0.21  | 0.24  | 0.46  | 0.24   | 0.41     |
|          |               | $\pi_2$  | 0.16  | 0.15   | 0.13  | 0.15  | 0.18  | 0.20   | 0.13     |
|          | Length        | $\pi_1$  | 0.17  | 0.17   | 0.18  | 0.19  | 0.16  | 0.22   | 0.16     |
|          |               | $\pi_2$  | 0.15  | 0.15   | 0.15  | 0.16  | 0.12  | 0.17   | 0.15     |
|          | Length change | $\pi_1$  | -0.15 | -0.18  | -0.12 | -0.07 | -0.17 | 0.17   | -0.19    |
|          |               | $\pi_2$  | -0.15 | -0.16  | -0.14 | -0.06 | -0.18 | 0.20   | -0.23    |
| S8       | Coverage      | $\pi_1$  | 0.82  | 0.77   | 0.92  | 0.95  | 0.56  | 0.97   | 0.64     |
|          |               | $\pi_2$  | 0.90  | 0.90   | 0.94  | 0.95  | 0.75  | 0.91   | 0.91     |
|          | MSEx100       | $\pi_1$  | 0.48  | 0.44   | 0.26  | 0.26  | 0.76  | 0.26   | 0.66     |
|          |               | $\pi_2$  | 0.21  | 0.19   | 0.17  | 0.18  | 0.27  | 0.24   | 0.19     |
|          | Length        | $\pi_1$  | 0.18  | 0.17   | 0.18  | 0.20  | 0.16  | 0.22   | 0.16     |
|          |               | $\pi_2$  | 0.15  | 0.15   | 0.15  | 0.17  | 0.12  | 0.17   | 0.15     |
|          | Length change | $\pi_1$  | -0.11 | -0.19  | -0.12 | -0.05 | -0.17 | 0.16   | -0.19    |
|          |               | $\pi_2$  | -0.16 | -0.18  | -0.16 | -0.06 | -0.20 | 0.19   | -0.26    |
| S9       | Coverage      | $\pi_1$  | 0.77  | 0.65   | 0.87  | 0.94  | 0.36  | 0.97   | 0.44     |
|          |               | $\pi_2$  | 0.90  | 0.89   | 0.92  | 0.95  | 0.68  | 0.93   | 0.88     |
|          | MSEx100       | $\pi_1$  | 0.66  | 0.64   | 0.36  | 0.29  | 1.14  | 0.25   | 1.02     |
|          |               | $\pi_2$  | 0.23  | 0.21   | 0.19  | 0.17  | 0.36  | 0.21   | 0.27     |
|          | Length        | $\pi_1$  | 0.19  | 0.17   | 0.18  | 0.20  | 0.16  | 0.22   | 0.16     |
|          |               | $\pi_2$  | 0.15  | 0.14   | 0.14  | 0.17  | 0.12  | 0.17   | 0.14     |
|          | Length change | $\pi_1$  | -0.08 | -0.20  | -0.12 | -0.04 | -0.16 | 0.16   | -0.18    |
|          |               | $\pi_2$  | -0.15 | -0.18  | -0.18 | -0.06 | -0.20 | 0.19   | -0.27    |

Table C4: Coverage, MSE, and mean CrIL change for estimands  $\pi_1$  and  $\pi_2$ , for each method across scenarios [S10-12, S6].

| Scenario | Measure       | Estimand | BGLMM I | BGLMM II | HPP   | HCP   | BP    | BPbias | BPrandom |
|----------|---------------|----------|---------|----------|-------|-------|-------|--------|----------|
| S10      | Coverage      | $\pi_1$  | 0.98    | 0.98     | 0.98  | 0.98  | 0.88  | 0.82   | 0.92     |
|          |               | $\pi_2$  | 0.95    | 0.96     | 0.97  | 0.97  | 0.77  | 0.79   | 0.97     |
|          | MSEx100       | $\pi_1$  | 0.03    | 0.03     | 0.18  | 0.15  | 0.13  | 0.32   | 0.12     |
|          |               | $\pi_2$  | 0.09    | 0.09     | 0.12  | 0.12  | 0.12  | 0.19   | 0.09     |
|          | Length        | $\pi_1$  | 0.08    | 0.08     | 0.19  | 0.18  | 0.11  | 0.15   | 0.12     |
|          |               | $\pi_2$  | 0.12    | 0.13     | 0.16  | 0.16  | 0.08  | 0.11   | 0.14     |
|          | Length change | $\pi_1$  | -0.62   | -0.62    | -0.11 | -0.15 | -0.42 | -0.20  | -0.40    |
|          |               | $\pi_2$  | -0.29   | -0.27    | -0.10 | -0.10 | -0.44 | -0.25  | -0.31    |
| S11      | Coverage      | $\pi_1$  | 0.94    | 0.94     | 0.98  | 0.97  | 0.92  | 0.89   | 0.94     |
|          |               | $\pi_2$  | 0.95    | 0.96     | 0.96  | 0.96  | 0.82  | 0.84   | 0.97     |
|          | MSEx100       | $\pi_1$  | 0.08    | 0.08     | 0.17  | 0.15  | 0.12  | 0.28   | 0.12     |
|          |               | $\pi_2$  | 0.12    | 0.12     | 0.14  | 0.15  | 0.12  | 0.19   | 0.10     |
|          | Length        | $\pi_1$  | 0.11    | 0.12     | 0.19  | 0.18  | 0.12  | 0.17   | 0.13     |
|          |               | $\pi_2$  | 0.14    | 0.14     | 0.16  | 0.16  | 0.09  | 0.12   | 0.14     |
|          | Length change | $\pi_1$  | -0.44   | -0.44    | -0.10 | -0.13 | -0.36 | -0.12  | -0.35    |
|          |               | $\pi_2$  | -0.21   | -0.19    | -0.08 | -0.07 | -0.37 | -0.16  | -0.28    |
| S12      | Coverage      | $\pi_1$  | 0.94    | 0.94     | 0.97  | 0.96  | 0.94  | 0.94   | 0.94     |
|          |               | $\pi_2$  | 0.96    | 0.96     | 0.96  | 0.96  | 0.89  | 0.92   | 0.96     |
|          | MSEx100       | $\pi_1$  | 0.14    | 0.14     | 0.18  | 0.17  | 0.15  | 0.25   | 0.14     |
|          |               | $\pi_2$  | 0.14    | 0.14     | 0.15  | 0.15  | 0.12  | 0.17   | 0.14     |
|          | Length        | $\pi_1$  | 0.15    | 0.15     | 0.19  | 0.19  | 0.14  | 0.19   | 0.14     |
|          |               | $\pi_2$  | 0.15    | 0.15     | 0.17  | 0.17  | 0.11  | 0.15   | 0.16     |
|          | Length change | $\pi_1$  | -0.29   | -0.28    | -0.09 | -0.10 | -0.26 | 0.01   | -0.28    |
|          |               | $\pi_2$  | -0.13   | -0.13    | -0.06 | -0.05 | -0.25 | -0.01  | -0.21    |
| S6       | Coverage      | $\pi_1$  | 0.94    | 0.94     | 0.98  | 0.97  | 0.93  | 0.97   | 0.94     |
|          |               | $\pi_2$  | 0.95    | 0.94     | 0.94  | 0.96  | 0.85  | 0.94   | 0.91     |
|          | MSEx100       | $\pi_1$  | 0.20    | 0.20     | 0.20  | 0.21  | 0.21  | 0.24   | 0.20     |
|          |               | $\pi_2$  | 0.18    | 0.17     | 0.19  | 0.17  | 0.20  | 0.22   | 0.23     |
|          | Length        | $\pi_1$  | 0.17    | 0.18     | 0.19  | 0.19  | 0.16  | 0.22   | 0.17     |
|          |               | $\pi_2$  | 0.16    | 0.16     | 0.17  | 0.17  | 0.13  | 0.17   | 0.17     |
|          | Length change | $\pi_1$  | -0.16   | -0.16    | -0.09 | -0.08 | -0.15 | 0.16   | -0.17    |
|          |               | $\pi_2$  | -0.08   | -0.09    | -0.04 | -0.04 | -0.11 | 0.19   | -0.15    |

Table C5: Coverage, MSE, and mean CrIL change for estimands  $\pi_1$  and  $\pi_2$ , for each method across scenarios [S13-15, S1].

| Scenario | Measure       | Estimand | BGLMM I | BGLMM II | HPP   | HCP   | BP    | BPbias | BPrandom |
|----------|---------------|----------|---------|----------|-------|-------|-------|--------|----------|
| S13      | Coverage      | $\pi_1$  | 0.27    | 0.27     | 0.98  | 0.97  | 0.61  | 0.87   | 0.73     |
|          |               | $\pi_2$  | 0.83    | 0.84     | 0.96  | 0.96  | 0.52  | 0.80   | 0.89     |
|          | MSEx100       | $\pi_1$  | 0.28    | 0.27     | 0.17  | 0.19  | 0.35  | 0.28   | 0.26     |
|          |               | $\pi_2$  | 0.19    | 0.18     | 0.12  | 0.14  | 0.26  | 0.19   | 0.17     |
|          | Length        | $\pi_1$  | 0.08    | 0.08     | 0.18  | 0.18  | 0.12  | 0.16   | 0.12     |
|          |               | $\pi_2$  | 0.11    | 0.11     | 0.14  | 0.16  | 0.08  | 0.11   | 0.13     |
|          | Length change | $\pi_1$  | -0.62   | -0.63    | -0.13 | -0.13 | -0.41 | -0.20  | -0.40    |
|          |               | $\pi_2$  | -0.36   | -0.37    | -0.20 | -0.12 | -0.46 | -0.25  | -0.36    |
| S14      | Coverage      | $\pi_1$  | 0.72    | 0.71     | 0.97  | 0.96  | 0.70  | 0.89   | 0.79     |
|          |               | $\pi_2$  | 0.89    | 0.90     | 0.96  | 0.94  | 0.66  | 0.83   | 0.92     |
|          | MSEx100       | $\pi_1$  | 0.24    | 0.23     | 0.17  | 0.19  | 0.33  | 0.28   | 0.25     |
|          |               | $\pi_2$  | 0.16    | 0.15     | 0.13  | 0.16  | 0.22  | 0.20   | 0.15     |
|          | Length        | $\pi_1$  | 0.11    | 0.11     | 0.18  | 0.18  | 0.12  | 0.17   | 0.13     |
|          |               | $\pi_2$  | 0.13    | 0.13     | 0.15  | 0.16  | 0.09  | 0.13   | 0.14     |
|          | Length change | $\pi_1$  | -0.46   | -0.47    | -0.13 | -0.12 | -0.36 | -0.12  | -0.36    |
|          |               | $\pi_2$  | -0.29   | -0.28    | -0.18 | -0.10 | -0.40 | -0.16  | -0.32    |
| S15      | Coverage      | $\pi_1$  | 0.88    | 0.88     | 0.97  | 0.96  | 0.81  | 0.94   | 0.86     |
|          |               | $\pi_2$  | 0.96    | 0.96     | 0.97  | 0.97  | 0.81  | 0.90   | 0.96     |
|          | MSEx100       | $\pi_1$  | 0.22    | 0.20     | 0.18  | 0.21  | 0.29  | 0.26   | 0.24     |
|          |               | $\pi_2$  | 0.13    | 0.12     | 0.12  | 0.14  | 0.16  | 0.18   | 0.12     |
|          | Length        | $\pi_1$  | 0.14    | 0.14     | 0.18  | 0.19  | 0.14  | 0.19   | 0.14     |
|          |               | $\pi_2$  | 0.14    | 0.14     | 0.15  | 0.17  | 0.10  | 0.15   | 0.15     |
|          | Length change | $\pi_1$  | -0.30   | -0.30    | -0.12 | -0.10 | -0.27 | 0.01   | -0.29    |
|          |               | $\pi_2$  | -0.19   | -0.19    | -0.14 | -0.07 | -0.30 | -0.01  | -0.27    |
| S1       | Coverage      | $\pi_1$  | 0.92    | 0.93     | 0.97  | 0.96  | 0.89  | 0.97   | 0.91     |
|          |               | $\pi_2$  | 0.95    | 0.94     | 0.96  | 0.95  | 0.90  | 0.93   | 0.97     |
|          | MSEx100       | $\pi_1$  | 0.21    | 0.21     | 0.18  | 0.22  | 0.24  | 0.27   | 0.22     |
|          |               | $\pi_2$  | 0.15    | 0.14     | 0.14  | 0.17  | 0.14  | 0.23   | 0.12     |
|          | Length        | $\pi_1$  | 0.17    | 0.17     | 0.19  | 0.19  | 0.16  | 0.22   | 0.16     |
|          |               | $\pi_2$  | 0.15    | 0.15     | 0.16  | 0.17  | 0.12  | 0.17   | 0.16     |
|          | Length change | $\pi_1$  | -0.17   | -0.17    | -0.10 | -0.08 | -0.17 | 0.16   | -0.19    |
|          |               | $\pi_2$  | -0.14   | -0.14    | -0.11 | -0.06 | -0.16 | 0.19   | -0.20    |



## Appendix D - WinBUGS code

### Begg & Pilote (BP) original method

```
model{
  # Model for RCTs.
  for(i in 1:N1){
    r1[i] ~ dbin(p1[i], totaln1[i])
    r2[i] ~ dbin(p2[i], totaln2[i])
    p1[i] <- phi(theta[i])
    p2[i] <- phi(theta[i] + delta)
  }

  # Model for single-arm studies on treatment 1.
  for(j in 1:N2){
    r3[j] ~ dbin(p3[j], totaln3[j])
    p3[j] <- phi(theta[j + N1])
  }

  # Model for single-arm studies on treatment 2.
  for(j in 1:N3){
    r4[j] ~ dbin(p4[j], totaln4[j])
    p4[j] <- phi(theta[j + N1 + N2] + delta)
  }

  # Model to combine effects.
  for(j in 1:(N1 + N2 + N3)){
    theta[j] ~ dnorm(mu.theta, tau.theta)
  }

  # Priors.
  mu.theta ~ dnorm(0, 0.001)
  delta ~ dnorm(0, 0.001)
  tau.theta ~ dgamma(0.001, 0.001)
  var.theta <- 1 / tau.theta

  # Estimands.
  pi1 <- phi(mu.theta / sqrt(1 + var.theta))
  pi2 <- phi((mu.theta + delta) / sqrt(1 + var.theta))
  OR <- (pi2 / (1 - pi2)) / (pi1 / (1 - pi1))
}
```

## Begg & Pilote method with bias-adjustment (BPbias)

```
model{
  # Model for RCTs.
  for(i in 1:N1){
    r1[i] ~ dbin(p1[i], totaln1[i])
    r2[i] ~ dbin(p2[i], totaln2[i])
    p1[i] <- phi(theta[i])
    p2[i] <- phi(theta[i] + delta)
  }

  # Model for single-arm studies on treatment 1.
  for(j in 1:N2){
    r3[j] ~ dbin(p3[j], totaln3[j])
    p3[j] <- phi(theta[j + N1] + xi)
  }

  # Model for single-arm studies on treatment 2.
  for(j in 1:N3){
    r4[j] ~ dbin(p4[j], totaln4[j])
    p4[j] <- phi(theta[j + N1 + N2] + delta + eta)
  }

  # Model to combine effects.
  for(j in 1:(N1 + N1 + N3)){
    theta[j] ~ dnorm(mu.theta, tau.theta)
  }

  # Priors.
  mu.theta ~ dnorm(0, 0.001)
  delta ~ dnorm(0, 0.001)
  tau.theta ~ dgamma(0.001, 0.001)
  var.theta <- 1 / tau.theta
  xi ~ dnorm(0, 0.001)
  eta ~ dnorm(0, 0.001)

  # Estimands.
  pi1 <- phi(mu.theta / sqrt(1 + var.theta))
  pi2 <- phi((mu.theta + delta) / sqrt(1 + var.theta))
  OR <- (pi2 / (1 - pi2)) / (pi1 / (1 - pi1))
}
```

## Begg & Pilote method with random effects (BPrandom)

```
model{
  # Model for RCTs.
  for(i in 1:N1){
    r1[i] ~ dbin(p1[i], totaln1[i])
    r2[i] ~ dbin(p2[i], totaln2[i])
    p1[i] <- phi(theta[i])
    p2[i] <- phi(theta[i] + delta[i])
  }

  # Model for single-arm studies on treatment 1.
  for(j in 1:N2){
    r3[j] ~ dbin(p3[j], totaln3[j])
    p3[j] <- phi(theta[j + N1])
  }

  # Model for single-arm studies on treatment 2.
  for(j in 1:N3){
    r4[j] ~ dbin(p4[j], totaln4[j])
    p4[j] <- phi(theta[j + N1 + N2] + delta[j + N1])
  }

  # Model to combine effects.
  for(j in 1:(N1 + N2 + N3)){
    theta[j] ~ dnorm(mu.theta, tau.theta)
  }

  for(j in 1:(N1 + N3)){
    delta[j] ~ dnorm(mu.delta, tau.delta)
  }

  # Priors.
  mu.theta ~ dnorm(0, 0.001)
  mu.delta ~ dnorm(0, 0.001)
  tau.theta ~ dgamma(0.001, 0.001)
  tau.delta ~ dgamma(0.001, 0.001)
  var.theta <- 1 / tau.theta
  var.delta <- 1 / tau.delta

  # Estimands.
  pi1 <- phi(mu.theta / sqrt(1 + var.theta))
  pi2 <- phi((mu.theta + mu.delta) / sqrt(1 + var.theta + var.delta))
  OR <- (pi2 / (1 - pi2)) / (pi1 / (1 - pi1))
}
```

## Bivariate generalised mixed-effects model (BGLMM) I

```
model{
  # Model for RCTs.
  for(i in 1:N1){
    r1[i] ~ dbin(p1[i], totaln1[i])
    r2[i] ~ dbin(p2[i], totaln2[i])
    p1[i] <- phi(mu1 + vi[i, 1])
    p2[i] <- phi(mu2 + vi[i, 2])
    vi[i, 1:2] ~ dmnorm(mn[1:2], T[1:2, 1:2])
  }

  # Model for single-arm studies on treatment 1.
  for(j in 1:N2){
    r3[j] ~ dbin(p3[j], totaln3[j])
    p3[j] <- phi(mu1 + s[j])
    s[j] ~ dnorm(0, tau1)
  }

  # Model for single-arm studies on treatment 2.
  for(j in 1:N3){
    r4[j] ~ dbin(p4[j], totaln4[j])
    p4[j] <- phi(mu2 + t[j])
    t[j] ~ dnorm(0, tau2)
  }

  # Priors.
  mu1 ~ dnorm(0, 0.001)
  mu2 ~ dnorm(0, 0.001)
  T[1:2,1:2] ~ dwish(R[1:2, 1:2], 2)
  tau1 ~ dgamma(0.001, 0.001)
  tau2 ~ dgamma(0.001, 0.001)

  # Estimands.
  invT[1:2, 1:2] <- inverse(T[, ])
  var1 <- invT[1, 1]
  var2 <- invT[2, 2]
  pi1 <- phi(mu1 / sqrt(1 + var1))
  pi2 <- phi(mu2 / sqrt(1 + var2))
  OR <- (pi2 / (1 - pi2)) / (pi1 / (1 - pi1))
}
```

## Bivariate generalised mixed-effects model (BGLMM) II

### Part 1

```
model{
  # Model for single-arm studies on treatment 1.
  for(j in 1:N2){
    r3[j] ~ dbin(p3[j], totaln3[j])
    p3[j] <- phi(mu3 + s[j])
    s[j] ~ dnorm(0, tau1)
  }

  # Model for single-arm studies on treatment 2.
  for(j in 1:N3){
    r4[j] ~ dbin(p4[j], totaln4[j])
    p4[j] <- phi(mu4 + t[j])
    t[j] ~ dnorm(0, tau2)
  }

  # Priors.
  mu3 ~ dnorm(0, 0.001)
  mu4 ~ dnorm(0, 0.001)
  tau1 ~ dgamma(0.001, 0.001)
  tau2 ~ dgamma(0.001, 0.001)
}
```

## Part 2

```
model{
  # Model for RCTs.
  for(i in 1:N1){
    r1[i] ~ dbin(p1[i], totaln1[i])
    r2[i] ~ dbin(p2[i], totaln2[i])
    p1[i] <- phi(mu1 + vi[i, 1])
    p2[i] <- phi(mu2 + vi[i, 2])
    vi[i, 1:2] ~ dmnorm(mn[1:2], T[1:2, 1:2])
  }

  # Priors.
  mu3prec <- 1 / (mu3sd * mu3sd)
  mu4prec <- 1 / (mu4sd * mu4sd)
  mu1 ~ dnorm(mu3med, mu3prec)
  mu2 ~ dnorm(mu4med, mu4prec)
  T[1:2, 1:2] ~ dwish(R[1:2, 1:2], 2)

  # Estimands.
  invT[1:2, 1:2] <- inverse(T[, ])
  var1 <- invT[1, 1]
  var2 <- invT[2, 2]
  pi1 <- phi(mu1 / sqrt(1 + var1))
  pi2 <- phi(mu2 / sqrt(1 + var2))
  OR <- (pi2 / (1 - pi2)) / (pi1 / (1 - pi1))
}
```

## Hierarchical power prior (HPP)

```
model{
  # Model for RCTs.
  for(i in 1:N1){
    r1[i] ~ dbin(p1[i], totaln1[i])
    r2[i] ~ dbin(p2[i], totaln2[i])
    p1[i] <- phi(mu1 + vi[i, 1])
    p2[i] <- phi(mu2 + vi[i, 2])
    vi[i, 1:2] ~ dmnorm(mn[1:2], T[1:2, 1:2])
  }
  # Model for single-arm studies on treatment 1.
  for(j in 1:N2){
    z1[j] ~ dpois(phi1[j])
    phi1[j] <- a1 * -(r3[j] * log(p3[j]) +
      (totaln3[j] - r3[j]) * log(1 - p3[j])) + const
    p3[j] <- phi(mu1 + s[j])
    s[j] ~ dnorm(0, tau1)
  }
  # Model for single-arm studies on treatment 2.
  for(j in 1:N3){
    z2[j] ~ dpois(phi2[j])
    phi2[j] <- a2 * -(r4[j] * log(p4[j]) +
      (totaln4[j] - r4[j]) * log(1 - p4[j])) + const
    p4[j] <- phi(mu2 + t[j])
    t[j] ~ dnorm(0, tau2)
  }

  # Priors.
  mu1 ~ dnorm(0, 0.001)
  mu2 ~ dnorm(0, 0.001)
  T[1:2,1:2] ~ dwish(R[1:2, 1:2], 2)
  tau1 ~ dgamma(0.001, 0.001)
  tau2 ~ dgamma(0.001, 0.001)
  a1 ~ dbeta(10, 1)
  a2 ~ dbeta(10, 1)

  # Estimands.
  invT[1:2, 1:2] <- inverse(T[, ])
  var1 <- invT[1, 1]
  var2 <- invT[2, 2]
  pi1 <- phi(mu1 / sqrt(1 + var1))
  pi2 <- phi(mu2 / sqrt(1 + var2))
  OR <- (pi2 / (1 - pi2)) / (pi1 / (1 - pi1))
}
```

## Hierarchical commensurate prior (HCP)

```
model{
  # Model for RCTs.
  for(i in 1:N1){
    r1[i] ~ dbin(p1[i], totaln1[i])
    r2[i] ~ dbin(p2[i], totaln2[i])
    p1[i] <- phi(mu1 + vi[i, 1])
    p2[i] <- phi(mu2 + vi[i, 2])
    vi[i, 1:2] ~ dmnorm(mn[1:2], T[1:2, 1:2])
  }

  # Model for single-arm studies on treatment 1.
  for(j in 1:N2){
    r3[j] ~ dbin(p3[j], totaln3[j])
    p3[j] <- phi(mu3 + s[j])
    s[j] ~ dnorm(0, tau1)
  }

  # Model for single-arm studies on treatment 2.
  for(j in 1:N3){
    r4[j] ~ dbin(p4[j], totaln4[j])
    p4[j] <- phi(mu4 + t[j])
    t[j] ~ dnorm(0, tau2)
  }

  # Priors.
  mu1 ~ dnorm(mu3, bias1)
  mu2 ~ dnorm(mu4, bias2)
  mu3 ~ dnorm(0, 0.001)
  mu4 ~ dnorm(0, 0.001)
  T[1:2,1:2] ~ dwish(R[1:2, 1:2], 2)
  tau1 ~ dgamma(0.01, 0.01)
  tau2 ~ dgamma(0.01, 0.01)
  bias1 ~ dgamma(0.01, 0.01)
  bias2 ~ dgamma(0.01, 0.01)

  # Estimands.
  invT[1:2, 1:2] <- inverse(T[, ])
  var1 <- invT[1, 1]
  var2 <- invT[2, 2]
  pi1 <- phi(mu1 / sqrt(1 + var1))
  pi2 <- phi(mu2 / sqrt(1 + var2))
  OR <- (pi2 / (1 - pi2)) / (pi1 / (1 - pi1))
}
```
